# Supplementary material for: Chitosan versus Carboxymethyl Chitosan Cryogels: Bacterial Colonization, Human Embryonic Kidney 293T Cell Culturing and Co-Culturing
Source: MDPI journal article supplement (doi:10.3390/ijms232012276), 2022-10-14
Supplement: s1 [file s1]

# Chitosan versus Carboxymethyl Chitosan Cryogels: Bacterial Colonization, Human Embryonic Kidney 293T Cell Culturing and Co-Culturing

Andrey Boroda <sup>1</sup>, Yuliya Privar <sup>2</sup>, Mariya Maiorova <sup>1</sup>, Irina Beleneva <sup>1</sup>, Marina Eliseikina<sup>1</sup>, Anna Skatova <sup>2</sup>, Dmitry Marinin<sup>2</sup> and Svetlana Bratskaya <sup>2,\*</sup>

<sup>1</sup> A.V. Zhirmunsky National Scientific Center of Marine Biology, Far Eastern Branch of Russian Academy of Sciences, 17, Palchevskogo street, 690041 Vladivostok, Russia

<sup>2</sup> Institute of Chemistry Far Eastern Branch of the Russian Academy of Sciences, 159, prosp.100-letiya Vladivostoka, 690022 Vladivostok, Russia

\* Correspondence: sbratska@ich.dvo.ru

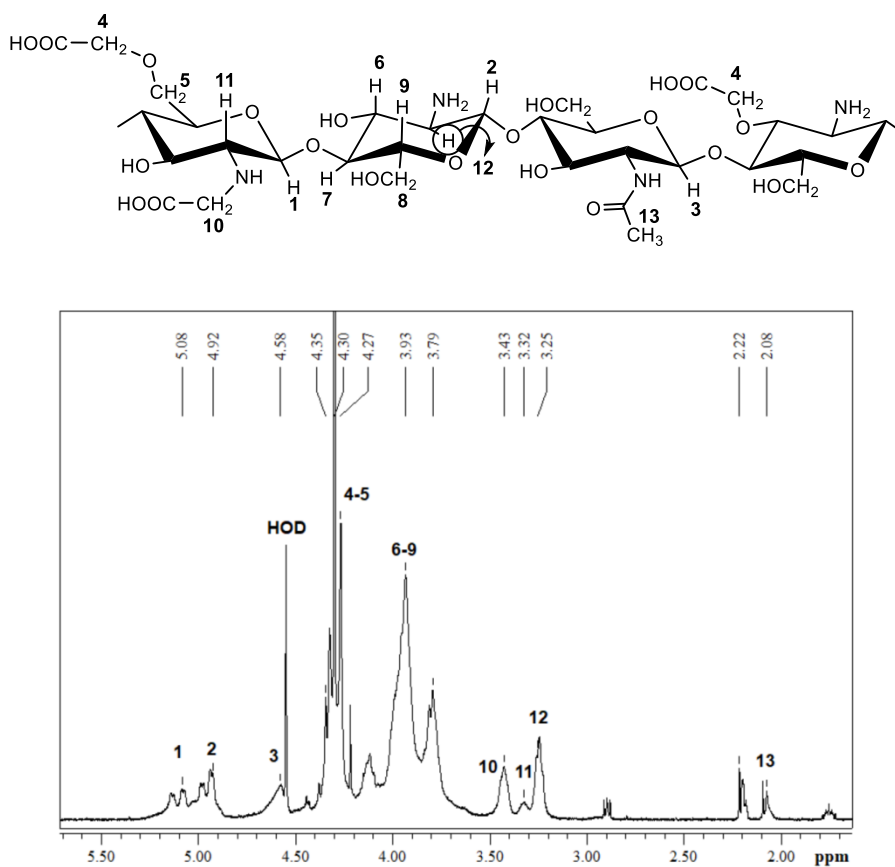

Figure S1. 400 MHz <sup>1</sup>H NMR spectrum of N,O-(carboxymethyl)chitosan

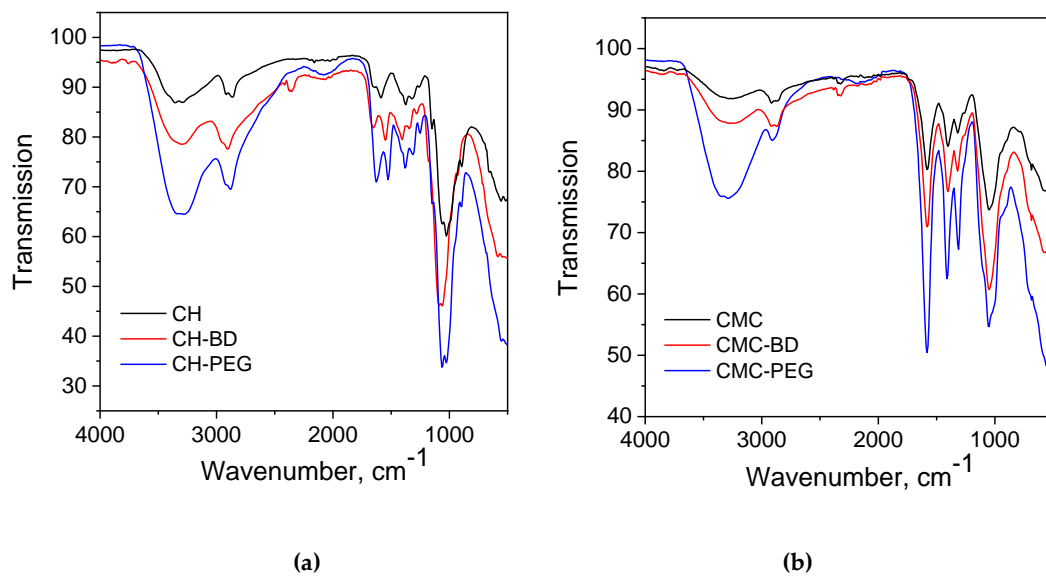

**Figure S2.** FI-IR spectra: 1 chitosan (CH) and chitosan-based cryogels (a); CMC and CMC-based cryogels (b).

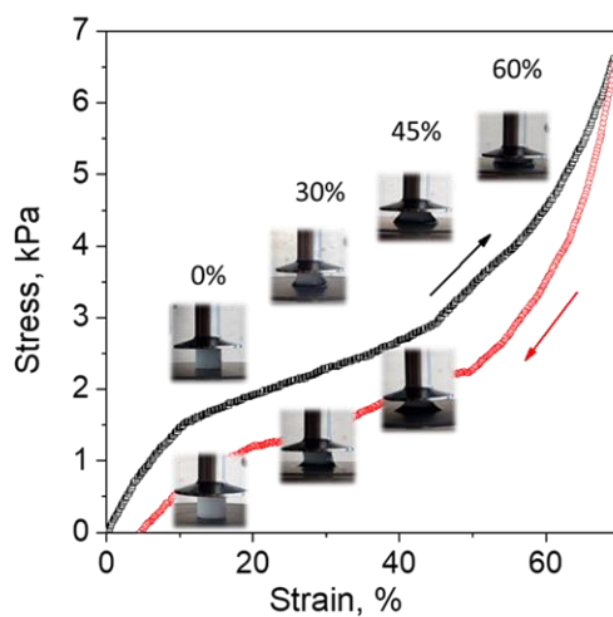

**Figure S3.** Strain-stress curve measured for CMC-PEG cryogel in the air and photos illustrated sample deformation and size recovery

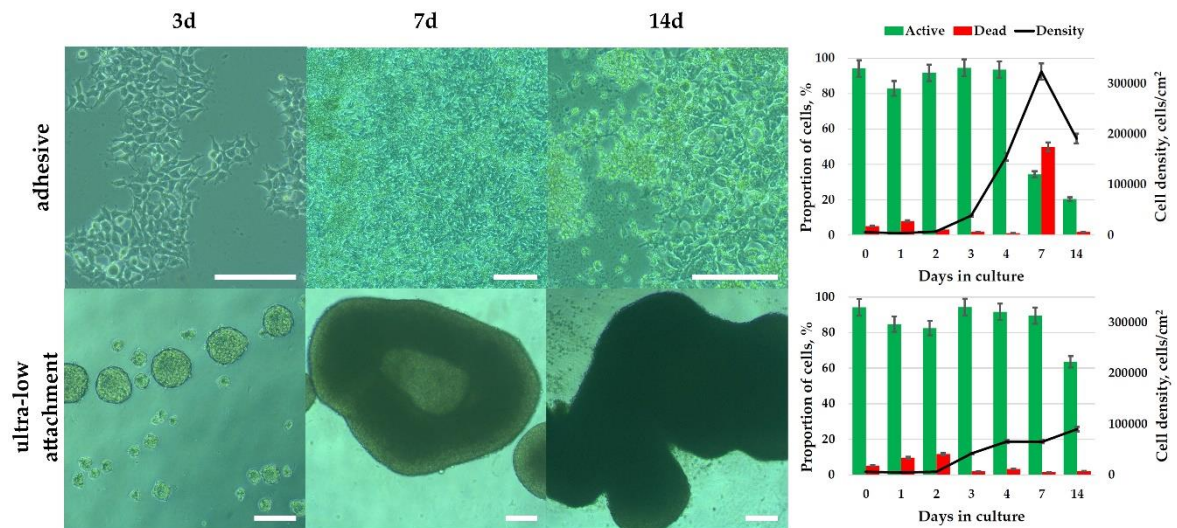

**Figure S4.** The results of flow cytometrical analysis and microscopic observation of human embryonic kidney cell line HEK-293T cultivated for 1, 2, 3, 4, 7 and 14 days in adhesive or ultra-low attachment plates. The cells were stained with H<sub>2</sub>DCFDA to assess the mitochondrial activity, and DAPI to stain dead cells. The data is presented as a mean of three independent experiments. Standard deviations did not exceed 5%. The cells were imaged under a CKX41 inverted microscope (Olympus, Japan) equipped with phase-contrast optics. Scale bar – 200  $\mu$ m.

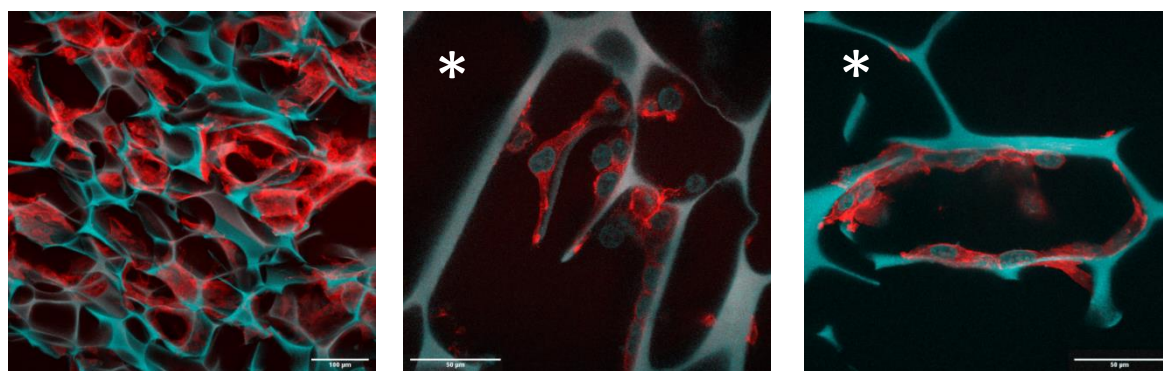

(a)

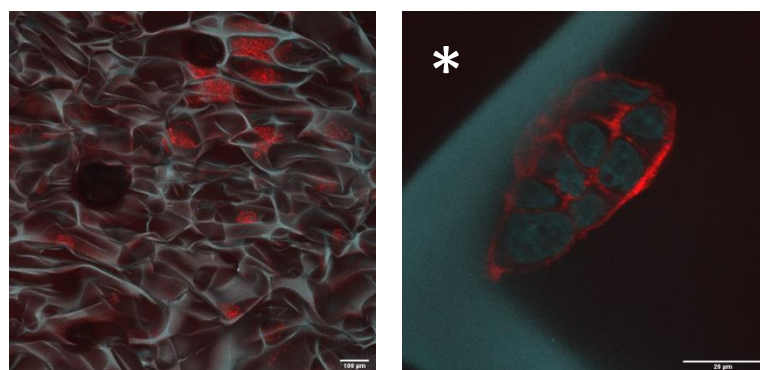

(b)

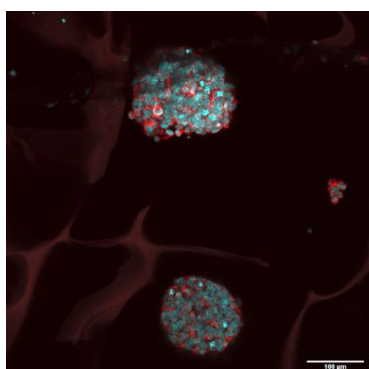

(c)

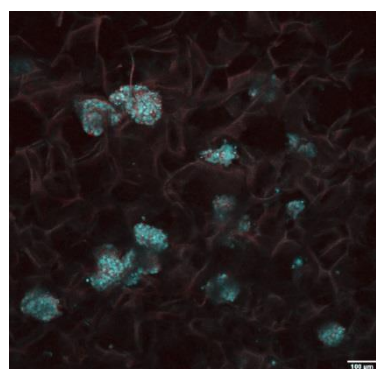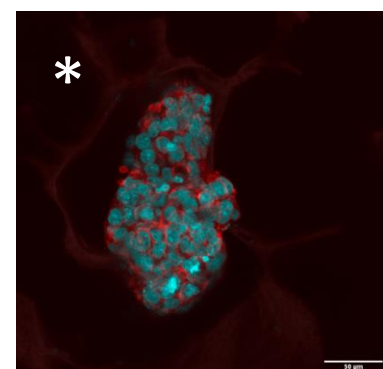

(d)

**Figure S5.** Confocal laser scanning microscopy (CLSM) images of HEK-293T cells after 3 days of cultivation in CH-BD (a) and CH-PEG (b) cryogels and after 10 days of cultivation in CMC-PEG (c) and CMC-BD (d) cryogels. and chitosan (CH)-based cryogels (BDDGE:polymer ratio of 1:4) with HCT 116 cells after 3, 7, and 14 days of cultivation. Scale bar—100  $\mu\text{m}$  or 50  $\mu\text{m}$  for the images marked with asterisk.

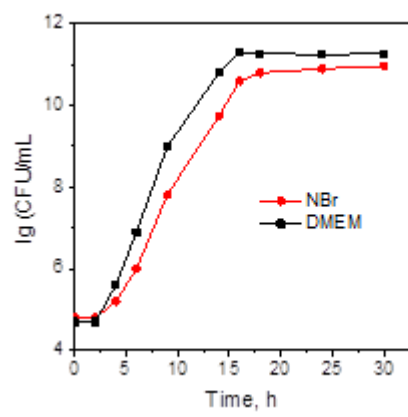

(a)

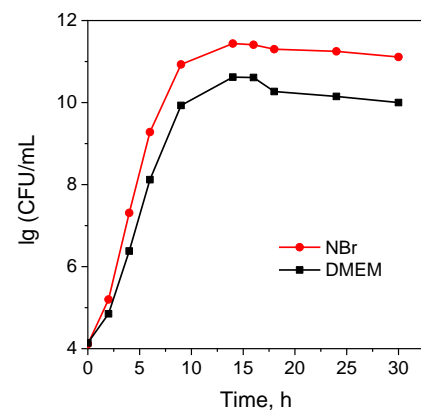

(b)

**Figure S6.** Growth curves of *Pseudomonas fluorescens* 1574 (a) and *Staphylococcus aureus* ATCC 21027 (b) in Nutrient Broth (NBr) and DMEM cell culture medium.

**Table S1.** Monomer composition of carboxymethyl chitosan (CMC)

| DA <sup>1</sup> | DS <sub>tot</sub> <sup>2</sup> | N-DS <sup>3</sup> | O-DS <sup>4</sup> | Monomer composition |      |                 |                     |
|-----------------|--------------------------------|-------------------|-------------------|---------------------|------|-----------------|---------------------|
|                 |                                |                   |                   | NH <sub>2</sub>     | NHR  | NR <sub>2</sub> | NHCOCH <sub>3</sub> |
| 0.25            | 1.49                           | 0.29              | 1.20              | 0.46                | 0.29 | 0               | 0.25                |

<sup>1</sup> - Degree of acetylation, <sup>2</sup> - Degree of carboxyalkyl substitution (total), <sup>3</sup> - Degree of N-carboxyalkyl substitution,

<sup>4</sup> - Degree of O-carboxyalkyl substitution

**Table S2.** Calculations of reagents quantities for the chitosan (CH) and carboxymethyl chitosan (CMC)cryogels fabrication

|         | Polymer  | Cross-linker | Cross-linker :<br>polymer<br>molar ratio | 3% polymer<br>solution, g | Cross-linker, g* |
|---------|----------|--------------|------------------------------------------|---------------------------|------------------|
| CH-BD   | Chitosan | BDDGE        | 1:4                                      | 5                         | 0,07755          |
| CH-PEG  |          | PEGDGE       | 1:12                                     | 5                         | 0.03834          |
| CMC-BD  | CMC      | BDDGE        | 1:2                                      | 5                         | 0.10136          |
| CMC-PEG |          | PEGDGE       | 1:8                                      | 5                         | 0.03759          |

\*BDDGE used as 60% solution; PEGDGE Mn~ 500 g/mol, used as >99% solution
